# Supplementary material
Source: PubMed Central journal article supplement (PMC5332589)

# THE LANCET

## Supplementary appendix

This appendix formed part of the original submission and has been peer reviewed.  
We post it as supplied by the authors.

Supplement to: Rothwell PM, Algra A, Chen Z, Diener H-C, Norrving B, Mehta Z.  
Effects of aspirin on risk and severity of early recurrent stroke after transient ischaemic  
attack and ischaemic stroke: time-course analysis of randomised trials. *Lancet* 2016;  
published online May 18. [http://dx.doi.org/10.1016/S0140-6736\(16\)30468-8](http://dx.doi.org/10.1016/S0140-6736(16)30468-8).

**Webappendix:** Pothwell PM, Algra A, Chen Z, Diener H-C, Norrving B, Mehta Z. Effects of aspirin on risk and severity of early recurrent stroke after transient ischaemic attack and ischaemic stroke: time-course analysis of randomised trials.

A population-based study (Oxford Vascular Study) of time-trends in patient behavior after TIA and minor stroke versus major stroke in relation to the FAST television campaigns in the UK. The shaded areas reflect the timing of the campaigns. Non-emergency presentation refers to patients making appointments to see their family doctor as opposed to presenting to the emergency department or calling for an ambulance. The lower graphs show the proportions of patients first seeking medical attention within 3 hours and within 24 hours.

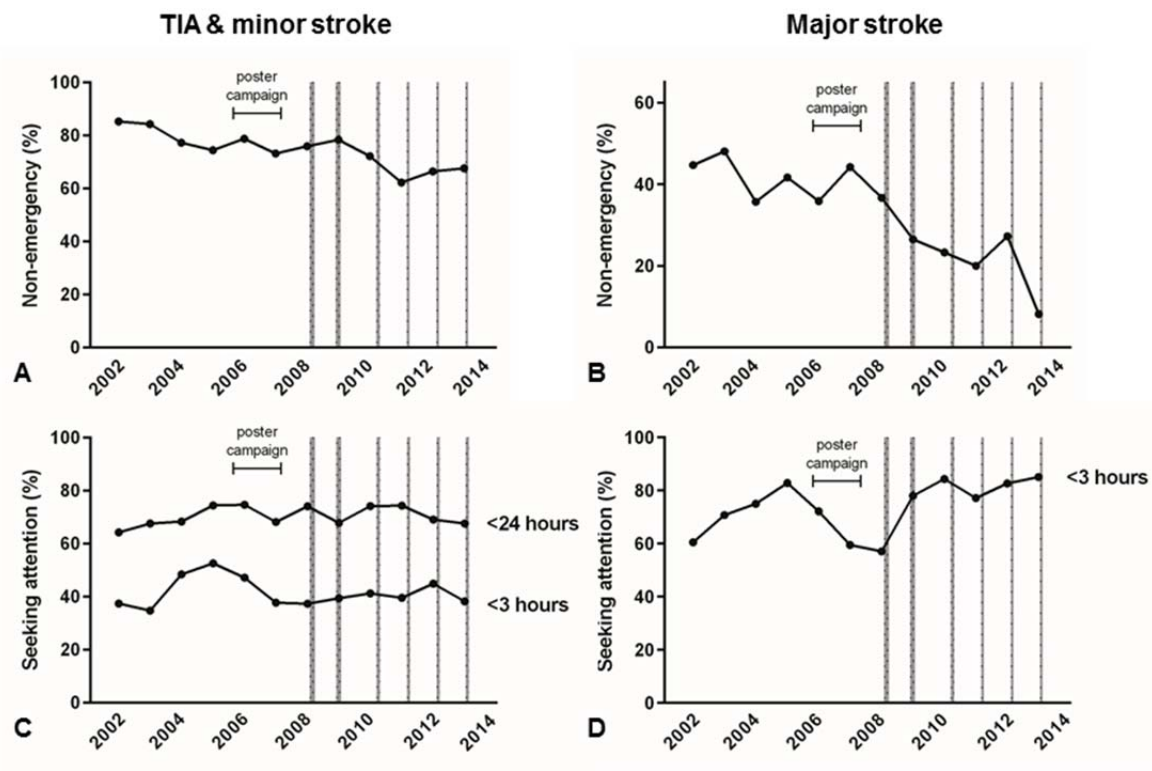

Courtesy of Dr Frank J. Wolters. Updated analysis from:

1. Wolters, FJ, Paul, NLM, Chandratheva, A et al. Contrasting impact of FAST-test public education campaign on behaviour after TIA and minor stroke versus major stroke: a population-based study. *Cerebrovascular Diseases* 2013, 35, 719-20.

2. Wolters FJ, Paul NL, Li L, Rothwell PM; Oxford Vascular Study. Sustained impact of UK FAST-test public education on response to stroke: a population-based time-series study. *Int J Stroke* 2015; 10:1108-14.

Severity of recurrent vascular events in the first 90-days after seeking medical attention in patients with TIA and minor stroke ascertained in the EXPRESS study in Phase-1 (standard treatment) versus Phase-2 (urgent treatment).<sup>1,2</sup> The effect of urgent treatment increased with increasing severity of recurrent event (interaction –  $p=0.002$ ).

|                             | <b>Phase-1</b> | <b>Phase-2</b> |
|-----------------------------|----------------|----------------|
| Patients                    | 310            | 281            |
| <b>Recurrent events</b>     |                |                |
| TIA                         | 17             | 15             |
| Non-disabling stroke #      | 16             | 5              |
| Disabling or fatal stroke # | 16             | 1              |

# Outcome is based on the modified Rankin score (mRS) at 1-3 months after the recurrent event: non-disabling stroke (mRS 0-2); Disabling or fatal stroke (mRS 3-6).

The 90-day risk of recurrent stroke after first seeking medical attention in all patients with TIA or stroke referred to the EXPRESS Study Clinic. The thick line represents phase-1 of the EXPRESS Study and the thin line represents phase-2.

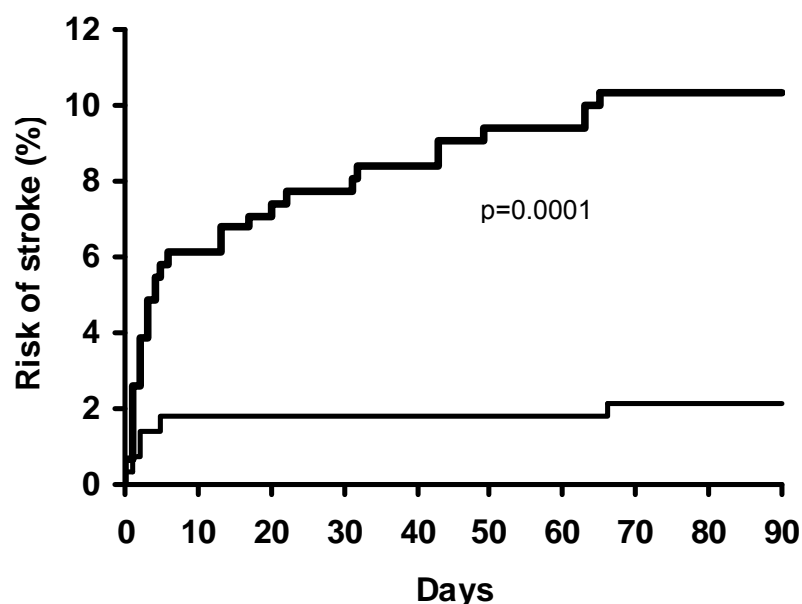

1. Rothwell PM, Giles MF, Chandratheva A, et al, on behalf of the Early use of Existing Preventive Strategies for Stroke (EXPRESS) Study. Major reduction in risk of early recurrent stroke by urgent treatment of TIA and minor stroke: EXPRESS Study. *Lancet* 2007; 370: 1432-42.

2. Luengo-Fernandez R, Gray AM, Rothwell PM. Effect of urgent treatment for transient ischaemic attack and minor stroke on disability and hospital costs (EXPRESS study): a prospective population-based sequential comparison. *Lancet Neurol.* 2009; 8:235-43.

Details of the trials of aspirin and/or dipyridamole in secondary prevention after TIA and ischaemic stroke included in analyses.

| Comparison / Trial                                           | Participants | Male (%) | Mean (SD) age (years) | Diabetes (%) | Hypertension (%) | Aspirin dose (mg) | Mean duration |
|--------------------------------------------------------------|--------------|----------|-----------------------|--------------|------------------|-------------------|---------------|
| <b><i>Aspirin alone vs no antiplatelet drug</i></b>          |              |          |                       |              |                  |                   |               |
| AITIA <sup>1</sup>                                           | 319          | 70%      | 58 (14)               | -            | -                | 1200              | 17            |
| UK-TIA <sup>2</sup>                                          | 2435         | 73%      | 60 (9)                | 4%           | 27%              | 300/1200          | 50            |
| Reuther <sup>3</sup>                                         | 60           | 65%      | 58 (10)               | 17%          | 50%              | 1500              | 24            |
| CA Co-op <sup>4</sup>                                        | 283          | 67%      | 61 (9)                | 8%           | 37%              | 1300              | 26            |
| Toulouse TIA <sup>5</sup>                                    | 303          | 86%      | 63 (9)                | -            | -                | 900               | 34            |
| AICLA <sup>6</sup>                                           | 402          | 68%      | 64 (10)               | 23%          | 64%              | 900               | 36            |
| Danish Co-op <sup>7</sup>                                    | 203          | 73%      | 59 (9)                | 6%           | -                | 1000              | 33            |
| Swedish Coop <sup>8</sup>                                    | 505          | 62%      | 68 (10)               | 17%          | 46%              | 1500              | 24            |
| Danish Low Dose <sup>9</sup>                                 | 301          | 65%      | 59 (8)                | 7%           | -                | 50                | 23            |
| SALT <sup>10</sup>                                           | 1359         | 66%      | 67 (7)                | 13%          | 47%              | 75                | 32            |
| ESPS-2 <sup>11,12</sup>                                      | 3298         | 58%      | 67 (11)               | 15%          | 61%              | 50                | 24            |
| <b><i>Aspirin + dipyridamole vs no antiplatelet drug</i></b> |              |          |                       |              |                  |                   |               |
| ESPS-1 <sup>13</sup>                                         | 2500         | 58%      | -                     | -            | -                | 975               | 23            |
| Toulouse TIA <sup>5</sup>                                    | 293          | 86%      | 63 (9)                | -            | -                | 900               | 34            |
| AICLA <sup>6</sup>                                           | 406          | 68%      | 64 (10)               | 23%          | 64%              | 900               | 36            |
| ESPS-2 <sup>11,12</sup>                                      | 3299         | 58%      | 67 (11)               | 15%          | 61%              | 50                | 24            |
| <b><i>Aspirin + dipyridamole vs aspirin</i></b>              |              |          |                       |              |                  |                   |               |
| ACCSG <sup>14</sup>                                          | 890          | 67%      | 63                    | 15%          | 48%              | 1300              | 25            |
| ESPS-2 <sup>11,12</sup>                                      | 3299         | 58%      | 67 (11)               | 15%          | 61%              | 50                | 24            |
| ESPRIT <sup>15</sup>                                         | 2763         | 66%      | 63 (11)               | 19%          | 60%              | 30-325            | 42            |
| EARLY <sup>16</sup>                                          | 548          | 62%      | 68                    | 24%          | 74%              | 50                | 7 days        |
| JASAP <sup>17</sup>                                          | 1295         | 72%      | 66 (8)                | 40%          | 88%              | 50/81             | 15            |
| Toulouse TIA <sup>5</sup>                                    | 284          | 86%      | 63 (9)                | -            | -                | 900               | 34            |
| AICLA <sup>6</sup>                                           | 400          | 68%      | 64 (10)               | 23%          | 64%              | 900               | 36            |
| <b><i>Dipyridamole vs no antiplatelet drug</i></b>           |              |          |                       |              |                  |                   |               |
| ESPS-2 <sup>11,12</sup>                                      | 3303         | 58%      | 67 (11)               | 15%          | 61%              | 50                | 24            |

## References

1. Fields WS, Lemak NA, Frankowski RF, Hardy RJ. Controlled trial of aspirin in cerebral ischemia. *Stroke* 1977;8:301-14
2. Farrell B, Godwin J, Richards S, Warlow C. The United Kingdom transient ischaemic attack (UK-TIA) aspirin trial: final results. *J Neurol Neurosurg Psychiatry* 1991;54:1044-1054
3. Reuther R, Dorndorf W, Loew D. The treatment of transitory ischemic attacks with acetylsalicylic acid: results of a double-blind-study. *MMW Munch Med Wochenschr* 1980; 122: 795-8.
4. Canadian Co-operative Study Group. A randomised trial of aspirin and sulfipyrazone in threatened stroke. *N Engl J Med* 1978;299:53-9
5. Toulouse TIA. Guiraud-Chaumeil B, Rascol A, David J, Boneu B, Clanet M, Bierme R. Prévention des récides des accidents vasculaires cérébraux ischémiques par les anti-agrégants plaquettaires. *Rev Neurol (Paris)* 1982;138:367-85
6. Bousser MG, Eschwège E, Haguenau M, Lefauconnier JM, Thibult N, Touboul D, et al. "AICLA" controlled trial of aspirin and dipyridamole in the secondary prevention of athero-thrombotic cerebral ischaemia. *Stroke* 1983;14:5-14.
7. Sorensen PS, Pedersen H, Marquardsen J, Petersson H, Heltberg A, Simonsen N, et al. Acetylsalicylic acid in the prevention of stroke in patients with reversible cerebral ischemic attacks. A Danish cooperative study. *Stroke* 1983;14:15-22.
8. Britton M, Helmers C, Samuelsson K. High-dose acetylsalicylic acid after cerebral infarction. A Swedish co-operative study. *Stroke* 1987;18:325-34.
9. Boysen G, Soelberg-Sørensen P, Juhler M, Andersen AR, Boas J, Olsen JS, et al. Danish very-low-dose aspirin after carotid endarterectomy trial. *Stroke* 1988;19:1211-5.
10. SALT Collaborative Group. Swedish aspirin low-dose trial (SALT) of 75mg aspirin as secondary prophylaxis after cerebrovascular ischaemic events. *Lancet* 1991;338:1345-9
11. Diener HC, Cunha L, Forbes C, Sivenius J, Smets P, Lowenthal A. European Stroke Prevention Study 2. Dipyridamole and acetylsalicylic acid in the secondary prevention of stroke. *J Neurol Sci* 1996;143:1-13.
12. ESPS 2 Group. European stroke prevention study: 2. Efficacy and safety data. *J Neurol Sci* 1997; 151(suppl): S1-77
11. Gent M, Barnett HJM, Sackett DL, Taylor DW. A randomized trial of aspirin and sulfipyrazone in patients with threatened stroke. Results and methodologic issues. *Circulation* 1980;62(suppl V):97-105
13. The ESPS Group. The European Stroke Prevention Study (ESPS). Principal end-points. *Lancet* 1987; 2:1351-4.
14. The American-Canadian Co-Operative Study group. Persantine Aspirin Trial in cerebral ischemia. Part II: Endpoint results. *Stroke* 1985; 16: 406-15
15. The ESPRIT Study Group. Aspirin plus dipyridamole versus aspirin alone after cerebral ischaemia of arterial origin (ESPRIT): a randomised controlled trial. *Lancet* 2006;367:1665-73.
16. Dengler R, Diener HC, Schwartz A, Grond M, Schumacher H, Machnig T, Eschenfelder CC, Leonard J, Weissenborn K, Kastrup A, Haberl R; EARLY Investigators. Early treatment with aspirin plus extended-release dipyridamole for transient ischaemic attack or ischaemic stroke within 24 h of symptom onset (EARLY trial): a randomised, open-label, blinded-endpoint trial. *Lancet Neurol* 2010; 9: 159-66.
17. Uchiyama S, Ikeda Y, Urano Y, Horie Y, Yamaguchi T. The Japanese aggrenox (extended-release dipyridamole plus aspirin) stroke prevention versus aspirin programme (JASAP) study: a randomized, double-blind, controlled trial. *Cerebrovasc Dis* 2011; 31: 601-13.

Meta-analyses of the effects of aspirin (any aspirin vs control and aspirin only vs control) on risk of any recurrent ischaemic stroke and any disabling ischaemic stroke within 12 weeks of randomisation.

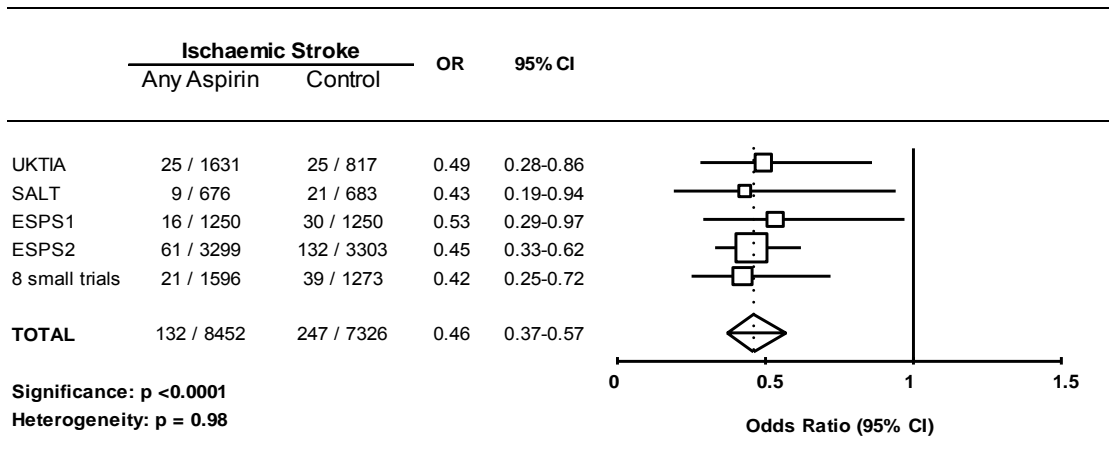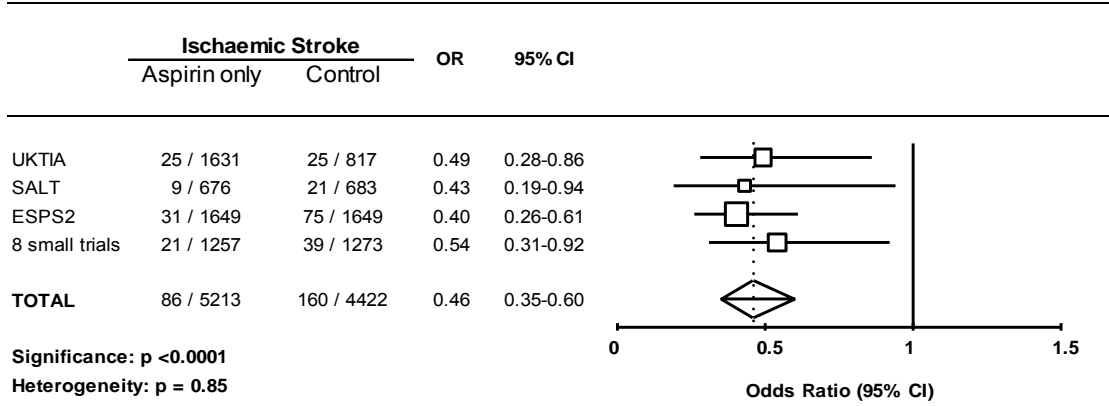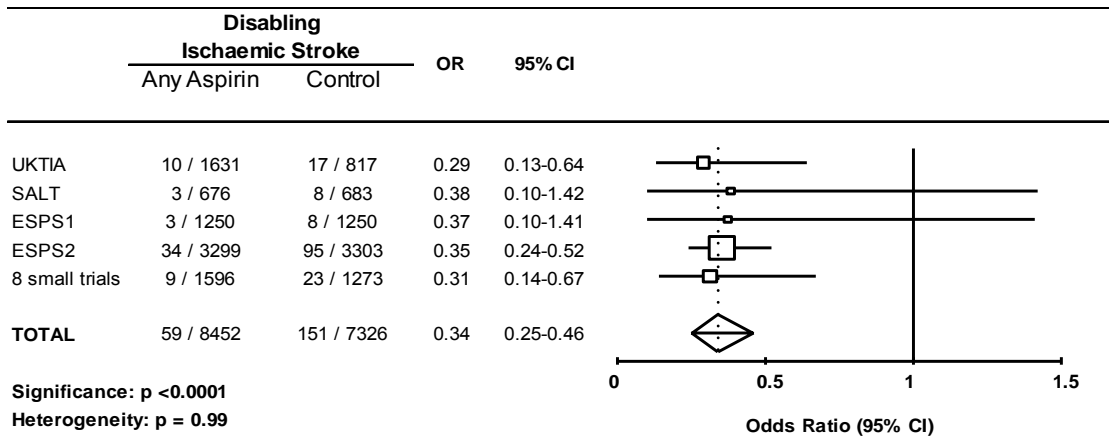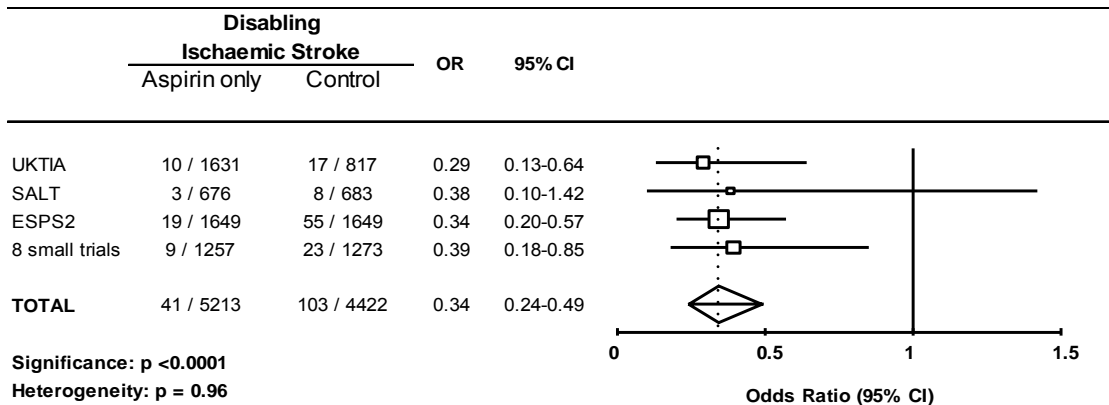

Pooled analysis of the effect of any aspirin vs control in secondary prevention after TIA and ischaemic stroke on the early risk of any recurrent ischaemic stroke and on disabling or fatal ischaemic stroke stratified by baseline clinical characteristics. Complete baseline data available on only the 10,409 participants in UKTIA, SALT and ESPS-2.

|                                            | HR   | LL   | UL   | p       | p(interaction) |
|--------------------------------------------|------|------|------|---------|----------------|
| <b>All ischaemic stroke</b>                |      |      |      |         |                |
| <b>Age</b>                                 |      |      |      |         | 0.95           |
| <65                                        | 0.50 | 0.33 | 0.74 | 0.0006  |                |
| 65-74                                      | 0.39 | 0.26 | 0.57 | <0.0001 |                |
| ≥75                                        | 0.54 | 0.36 | 0.83 | 0.0049  |                |
| <b>Sex</b>                                 |      |      |      |         | 0.84           |
| Female                                     | 0.45 | 0.30 | 0.67 | <0.0001 |                |
| Male                                       | 0.48 | 0.36 | 0.64 | <0.0001 |                |
| <b>Hypertension</b>                        |      |      |      |         | 0.12           |
| No                                         | 0.66 | 0.42 | 1.05 | 0.079   |                |
| Yes                                        | 0.40 | 0.30 | 0.53 | <0.0001 |                |
| <b>Current smoking</b>                     |      |      |      |         | 0.57           |
| No                                         | 0.49 | 0.35 | 0.68 | <0.0001 |                |
| Yes                                        | 0.42 | 0.28 | 0.63 | <0.0001 |                |
| <b>Diabetes</b>                            |      |      |      |         | 0.92           |
| No                                         | 0.47 | 0.35 | 0.62 | <0.0001 |                |
| Yes                                        | 0.43 | 0.24 | 0.77 | 0.0045  |                |
| <b>Aspirin Dose</b>                        |      |      |      |         | 0.53           |
| Low (≤100mg)                               | 0.51 | 0.37 | 0.71 | <0.0001 |                |
| High (≥300mg)                              | 0.44 | 0.33 | 0.59 | <0.0001 |                |
| <b>Disabling or fatal ischaemic stroke</b> |      |      |      |         |                |
| <b>Age</b>                                 |      |      |      |         | 0.44           |
| <65                                        | 0.33 | 0.17 | 0.66 | 0.0017  |                |
| 65-74                                      | 0.27 | 0.16 | 0.45 | <0.0001 |                |
| ≥75                                        | 0.48 | 0.29 | 0.81 | 0.0056  |                |
| <b>Sex</b>                                 |      |      |      |         | 0.84           |
| Female                                     | 0.34 | 0.20 | 0.57 | <0.0001 |                |
| Male                                       | 0.36 | 0.24 | 0.54 | <0.0001 |                |
| <b>Hypertension</b>                        |      |      |      |         | 0.20           |
| No                                         | 0.52 | 0.29 | 0.95 | 0.033   |                |
| Yes                                        | 0.29 | 0.19 | 0.43 | <0.0001 |                |
| <b>Current smoking</b>                     |      |      |      |         | 0.45           |
| No                                         | 0.39 | 0.25 | 0.60 | <0.0001 |                |
| Yes                                        | 0.30 | 0.18 | 0.51 | <0.0001 |                |
| <b>Diabetes</b>                            |      |      |      |         | 0.77           |
| No                                         | 0.36 | 0.25 | 0.52 | <0.0001 |                |
| Yes                                        | 0.30 | 0.14 | 0.67 | 0.0034  |                |
| <b>Aspirin dose</b>                        |      |      |      |         | 0.82           |
| Low (≤100mg)                               | 0.33 | 0.20 | 0.55 | <0.0001 |                |
| High (≥300mg)                              | 0.36 | 0.24 | 0.52 | <0.0001 |                |

**Meta-analysis of the effect aspirin only vs. control on the risk of recurrent ischaemic stroke more than 12 weeks after randomisation in trials of aspirin in secondary prevention after TIA and ischaemic stroke.**

This preliminary analysis includes strokes known to be ischaemic and strokes of unknown type and the UK-TIA trial outcomes are confined to the 'major stroke; primary outcome (i.e. events with symptoms lasting longer than 7 days). The denominators are the numbers of patients at randomisation rather than at 12 weeks. The analysis is by intention-to-treat and so no account is taken of compliance with randomised treatment allocation. More detailed analyses are ongoing.

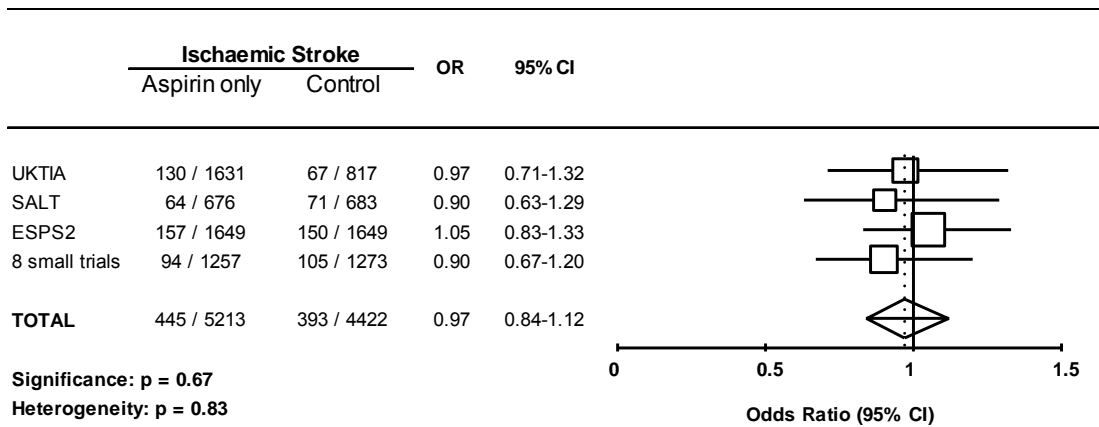



Details of the trials aspirin vs control in treatment of acute ischaemic stroke that were included in analyses.

### **CAST**<sup>1</sup>

Double blind

21,106 participants

63% male

28% were more than 70 years old

87% had CT before entry

Ischaemic stroke less than 48 hours since stroke onset

Interventions Rx: aspirin 160 mg once daily orally or via nasogastric tube

Control: placebo

Duration: 4 weeks, or until death or earlier discharge

FU: 4 weeks

### **IST**<sup>2</sup>

Unblinded

19,435 participants

54% male

61% more than 70 years

67% CT prior to randomisation, 29% CT after randomisation

Ischaemic stroke less than 48 hours since stroke onset

Interventions Rx: subcutaneous heparin (5000 IU or 12 500 IU 12 hourly), aspirin 300 mg, both, or neither (factorial design)

Duration: 14 days or until discharge from hospital

Interventions Rx: Aspirin by mouth if able to swallow, if not then by rectal suppository or by injection of 100 mg of the lysine salt of aspirin

FU: 6 months

### **Rödén-Jüllig**<sup>3</sup>

Double blind

441 participants

226 (51%) male

100% CT before entry

Ischaemic stroke less than 72 hours since stroke onset

Interventions Rx: aspirin 325 mg orally once daily

Control: placebo

Duration: 5 days

FU: 3 months

### **References**

1. CAST (Chinese Acute Stroke Trial) Collaborative Group. CAST: randomised placebo-controlled trial of early aspirin use in 20,000 patients with acute ischaemic stroke. *Lancet* 1997; 349: 1641-9.
2. International Stroke Trial Collaborative Group. The International Stroke Trial (IST): a randomised trial of aspirin, subcutaneous heparin, both, or neither among 19435 patients with acute ischaemic stroke. *Lancet*. 1997; 349: 1569-81.
3. Rödén-Jüllig A, Britton M, Malmkvist K, Leijd B. Aspirin in the prevention of progressing stroke: a randomized controlled study. *J Intern Med* 2003; 254: 584-90.

Meta-analysis of the effect of aspirin vs control on the 14-day risk of recurrent ischaemic stroke in trials of aspirin in treatment of acute stroke stratified by the extent of the initial neurological (mild, moderate or severe).

Heterogeneity between 3 severity groups:  $p=0.014$

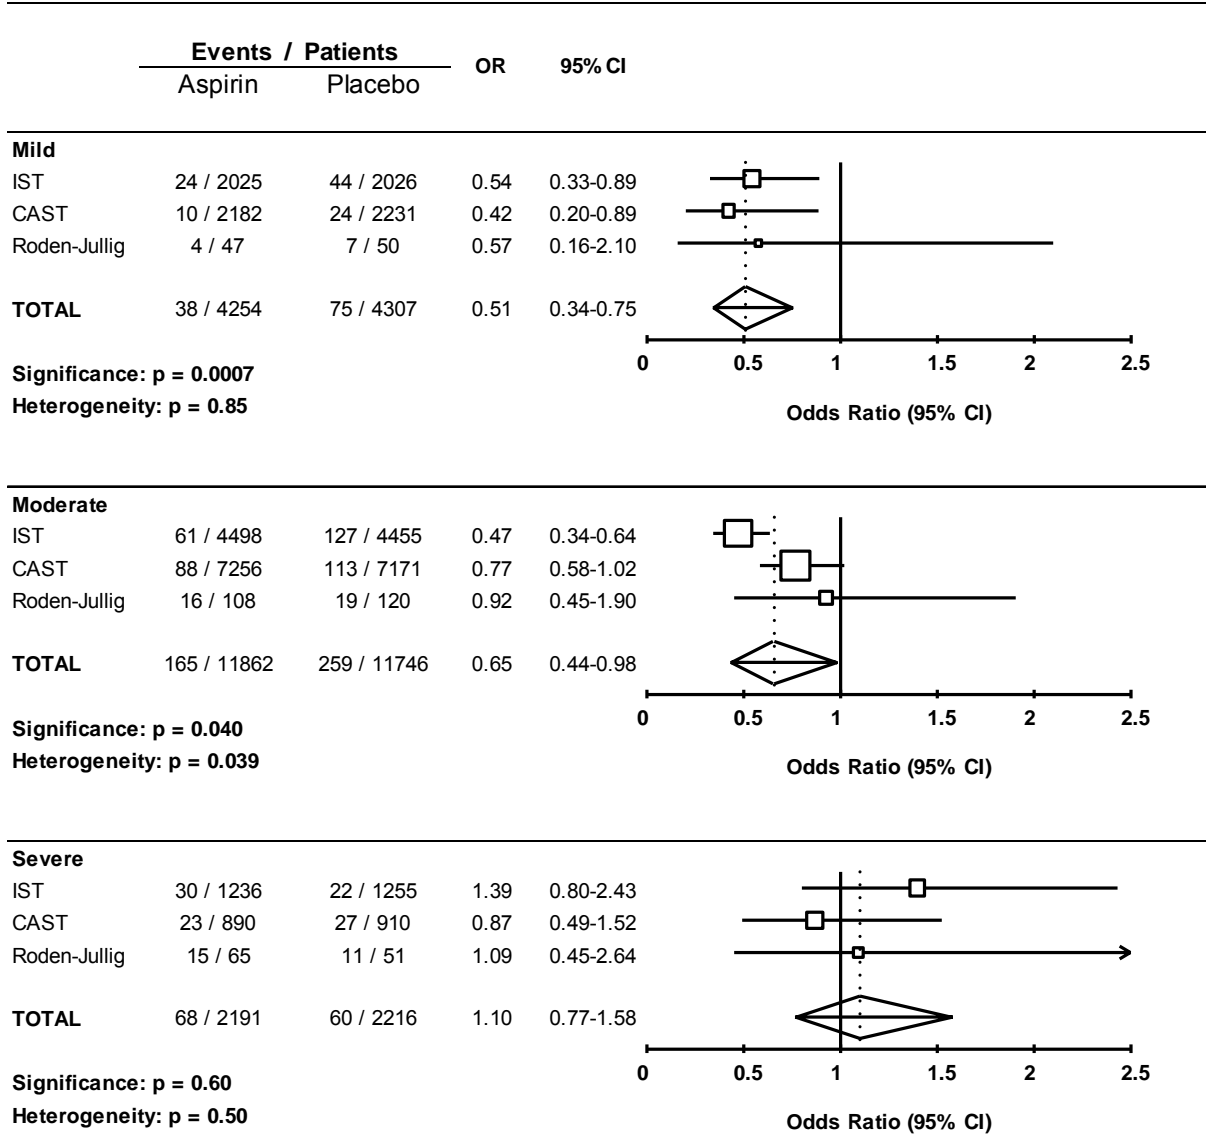

Pooled hazard ratios for the effect of aspirin vs control on risk of recurrent ischaemic stroke in patients with mild and moderately severe initial neurological deficits during early follow-up (days 0-1; 2-3,4-6; 7-14; >15) in two large trials of aspirin in treatment of acute stroke. This analysis is equivalent to figure 3 in the main body of the paper except that it includes 3292 (21.3%) patients with mild or moderately severe stroke in the International Stroke trial who had received aspirin during the days prior to randomisation.

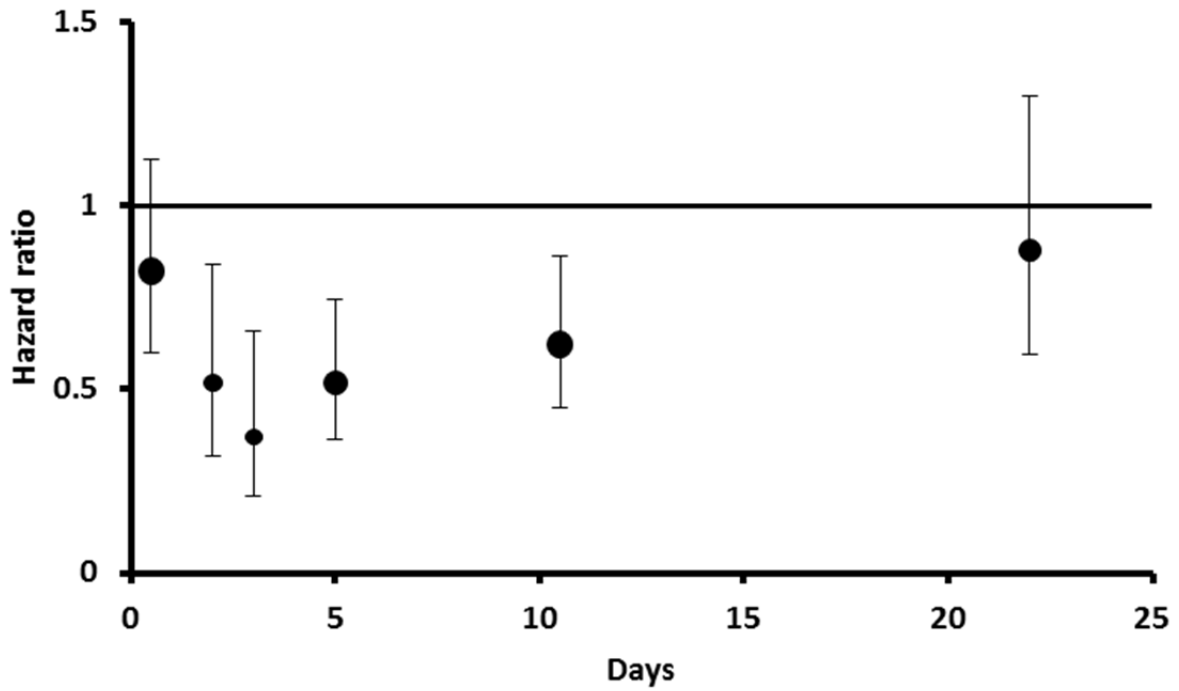

Meta-analysis of the effect dipyridamole plus aspirin versus aspirin alone on the risk of recurrent ischaemic stroke within 12 weeks after randomisation in trials in secondary prevention after TIA and ischaemic stroke.

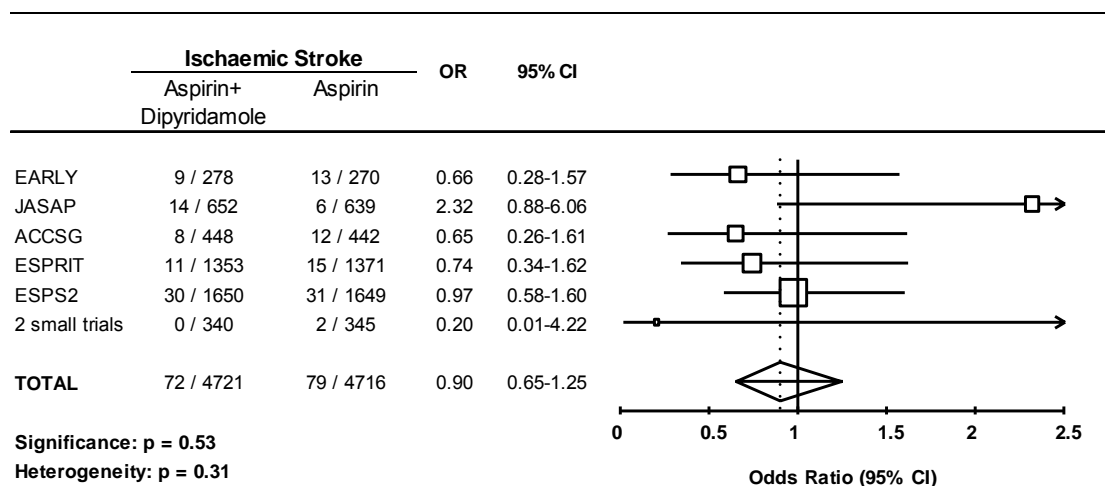

Supplement: mmc1.pdf [file mmc1.pdf]
